# Supplementary material for: Facile preparation of a ZnS/ZnO nanocomposite for robust sunlight photocatalytic H2 evolution from water
Source: Royal Society of Chemistry journal article supplement (doi:10.1039/c4ra13203c), 2014-12-17
Supplement: c4ra13203c1.pdf [file c4ra13203c1.pdf]

## Electronic Supplementary Information

### Facile preparation of ZnS/ZnO nanocomposite for robust sunlight photocatalytic H<sub>2</sub> evolution from water

Hui Zhao, Yuming Dong\*, Pingping Jiang\*, Xiuming Wu, Ruixian Wu, Yanmei Chen

Key Laboratory of Food Colloids and Biotechnology (Ministry of Education of China), School of  
Chemical and Material Engineering, Jiangnan University, Wuxi 214122, P. R. China

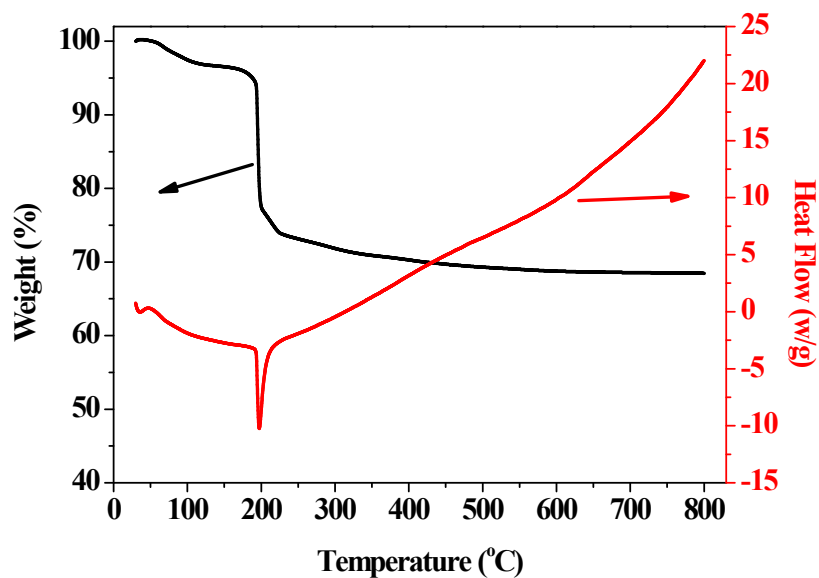

Fig. S1 TGA-DTA curves of ZnO precursor. The sample was kept in N<sub>2</sub> atmosphere operating at a heating rate of 10 °C/min. As shown, a big weight loss was observed in the 50 ~ 450 °C range due to the loss of surface adsorbed water molecules and the decomposition of ZnO precursor. There was nearly no weight loss when temperature was higher than 450 °C.

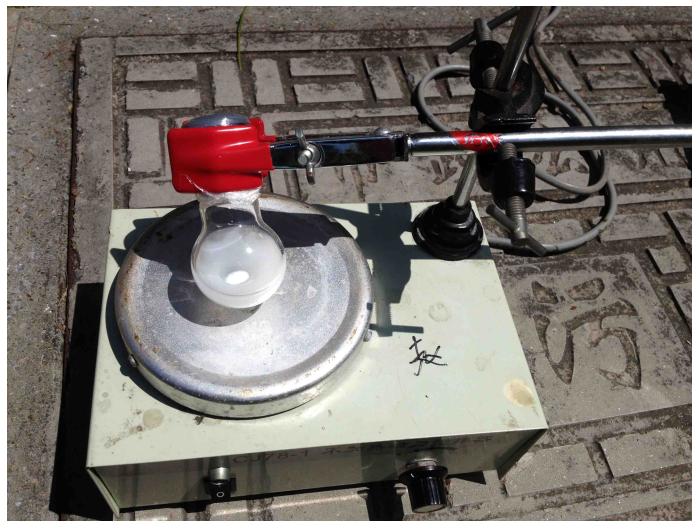

Fig. S2 The photo of outdoor equipment of sunlight-driven water splitting by ZnO/ZnS system in Wuxi city 2014. Experimental condition: Outdoor temperature: 30 ~ 32 °C, Time: 10: 00 ~ 14: 00.
